# Supplementary material
Source: PubMed Central journal article supplement (PMC5781233)

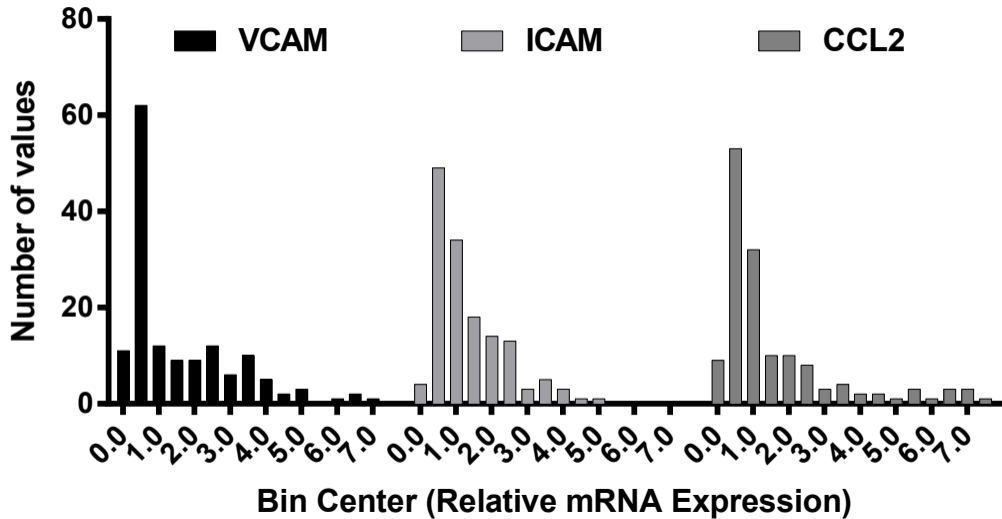

Supplement: NIHMS934819-supplement-S1.pdf [file NIHMS934819-supplement-S1.pdf]
